# Supplementary material
Source: publisher figshare collection journal article supplement (https://asha.figshare.com/articles/dataset/_/16569360)
Supplement: Supplementary file 1 [file 1]

### Supplemental Material S3.

#### *Utterance Designator Codes Used During Transcription to Indicate Which Measures Should Be Applied*

| UDC                                     | Description of utterance receiving UDC                                                                                                                                                     | Example of utterance and UDC                                                  | CS  | SV, REL,<br>GR,<br>CU, REF | GCS and<br>GCS <sub>conv</sub>       | %CIU and CIU <sub>conv</sub> |       |
|-----------------------------------------|--------------------------------------------------------------------------------------------------------------------------------------------------------------------------------------------|-------------------------------------------------------------------------------|-----|----------------------------|--------------------------------------|------------------------------|-------|
|                                         |                                                                                                                                                                                            |                                                                               |     |                            |                                      | [W]                          | [CIU] |
| <b>Incomplete, Elected</b> [IUEL]       | Speaker elects to trail off; often occurs in conversation                                                                                                                                  | “We stopped at the bakery on the way home, and so....” [IUEL]                 | NO  | NO                         | NO                                   | YES                          | YES   |
| <b>Incomplete, Revised</b> [IUR]        | Speaker revises formulation mid-utterance                                                                                                                                                  | “We stopped at the bak/ [IUR] We picked up great croissants on the way home.” | NO  | NO                         | NO                                   | YES                          | YES   |
| <b>Incomplete, Abandoned</b> [IUAB]     | Speaker leaves utterance incomplete due to lexical retrieval difficulty; often [but not always] accompanied by an overt utterance, behavior or struggle indicating lexical retrieval issue | “We stopped at the .../ [IUAB] What’s it called?”                             | YES | YES                        | NO                                   | YES                          | YES   |
| <b>Commentary on Performance</b> [PERF] | Commentary made on performance                                                                                                                                                             | “I always get stuck on this word.” [PERF]                                     | YES | YES                        | GCS: YES<br>GCS <sub>conv</sub> : NO | YES                          | YES   |

*Note.* UDC = utterance designator code; CS = Communicative Success; SV = Subject+Verb+(Object, if required); REL = Relevance in the SV(O) sentence frame; CU = Complete Utterance; REF = Referential Cohesion; GCS and GCS<sub>conv</sub> = 4-point Global Coherence Scale and 4-point Global Coherence Scale in Conversation; %CIU and %CIU<sub>conv</sub> = %Correct Information Unit and %Correct Information Unit in Conversation; NO = do not apply measure; YES = do apply measure.
