# Supplementary material
Source: publisher figshare collection journal article supplement (https://asha.figshare.com/articles/dataset/_/16569360)
Supplement: Supplementary file 2 [file 1]

## Supplemental Material S2.

### *Story Narrative Monologue Exemplar for Participants: "Chalk" (Thomson, 2010)*

---

Instructions: After looking through every page of "Chalk" with the participant, the examiner uses this script to tell the story while looking at the pages together with the participant. Book is oriented towards participant.

---

"Three kids are walking along a road in the rain. Up ahead they see the figure of a dinosaur that looks like it's a part of a playground. A blue bag with stars on it is hanging from the dinosaur's mouth. // The kids take the bag down and look inside. They discover that the bag is full of colored chalk. // One girl takes out a piece of yellow chalk. She bends down next to a puddle and draws a picture of the sun on the road. // Suddenly, the drawing becomes real, and a bright sun pops up out of the drawing and begins shining, just a few inches above the road. The sun is so bright the kids have to shield their eyes. They're really surprised. //

The kids look up and see the clouds parting and the real sun is gleaming down. The rain has stopped. // The next girl looks excited as she chooses a piece of pink chalk. She draws butterflies all over the road. // Suddenly butterflies begin coming to life from each drawing. The kids are very excited to see giant butterflies flying all around them. //

Now, the boy takes his turn. He looks mischievous as he selects his chalk. He draws a picture of a dinosaur like the one they saw on the playground. A few butterflies are still flitting around. // Suddenly the three kids are in the shadow of a real dinosaur with big teeth. They look surprised and a bit scared. // They run away very fast while the dinosaur chases them. //

They quickly try to hide on the playground. One kid goes into a tunnel. // The dinosaur is coming, and he can see all three kids, even though they are trying to hide. // Two kids are in the tunnel now, but the dinosaur bends down and looks inside. He can see where the kids are hiding. // Quickly, the boy, who still has the chalk, draws a cloud and rain on the inside of the tunnel. // The dinosaur looks up to the sky that is quickly becoming dark and ominous with clouds. It is beginning to rain again. // Now the rain is pouring down and one girl peers out from where she is hiding on the playground. She sees the dinosaur is beginning to melt! //

The kids come out of hiding and see all that is left of the dinosaur now is a very big green chalk smudge all over the ground. They look down at it and stand in the rain, getting wet. They decide to put the bag of chalk back on the playground dinosaur where they originally found it. // They continue on their way, down the road in the rain. The boy looks back at the playground dinosaur one last time, puzzled by all that has happened."

---

#### Language Data for Exemplar

---

Flesch-Kincaid Reading Level: 4<sup>th</sup> grade\*  
Number of Words: 463  
Average Number of Words/Sentence: 12.18  
Range for Number of Words/Sentence: 3-27  
Number of Sentences: 38

---

*Note.* // = cue to examiner to turn page; \* = Kincaid et al., 1975.

---

## Reference

Kincaid, J. P., Fishburne, R. P., Jr., Rogers, R. L., & Chissom, B. S. (1975). Derivation of new readability formulas for Navy enlisted personnel. In *Research Branch Report* (pp. 8–75). Naval Technical Training Command Millington (Tennessee) Research Branch.
