# Supplementary material
Source: publisher figshare collection journal article supplement (https://asha.figshare.com/articles/dataset/_/16569360)
Supplement: Supplementary file 3 [file 1]

## Supplemental Material S8.

### *People With Aphasia: Individual Data for Each Measure in Conversations 1 and 2*

| ID               | CS<br>Cv1    | CS<br>Cv2    | SV(O)<br>Cv1 | SV(O)<br>Cv2 | REL<br>Cv1   | REL<br>Cv2   | CU<br>Cv1    | CU<br>Cv2    | GR<br>Cv1    | GR<br>Cv2    | REF<br>Cv1   | REF<br>Cv2   | %CIU <sub>c</sub><br>Cv1 | %CIU <sub>c</sub><br>Cv2 | GCS <sub>c</sub><br>Cv1 | GCS <sub>c</sub><br>Cv2 |
|------------------|--------------|--------------|--------------|--------------|--------------|--------------|--------------|--------------|--------------|--------------|--------------|--------------|--------------------------|--------------------------|-------------------------|-------------------------|
| P1               | 3.472        | 3.650        | 0.929        | 0.935        | <b>0.714</b> | <b>0.903</b> | 0.643        | 0.839        | <b>0.750</b> | <b>0.912</b> | 0.867        | 1.000        | 0.628                    | 0.638                    | 3.679                   | 3.771                   |
| P2               | 3.794        | 3.604        | 0.928        | 0.973        | <b>0.897</b> | <b>0.635</b> | 0.825        | 0.649        | 0.913        | 0.946        | 0.847        | 0.486        | 0.774                    | 0.678                    | 3.736                   | 3.494                   |
| P3               | <b>2.466</b> | <b>2.851</b> | 0.556        | 0.534        | <b>0.515</b> | <b>0.759</b> | 0.343        | 0.397        | <b>0.694</b> | <b>0.833</b> | 0.273        | 0.500        | 0.475                    | 0.584                    | 3.167                   | 3.227                   |
| <i>P4</i>        | <i>3.877</i> | <i>3.800</i> | <i>0.911</i> | <i>0.892</i> | <i>0.933</i> | <i>0.973</i> | <i>0.867</i> | <i>0.865</i> | <i>0.906</i> | <i>0.902</i> | <i>0.905</i> | <i>0.941</i> | <i>0.674</i>             | <i>0.674</i>             | <i>3.979</i>            | <i>3.872</i>            |
| P5 <sup>^</sup>  | <b>3.404</b> | <b>3.049</b> | 0.729        | 0.625        | 0.882        | 0.898        | 0.647        | 0.568        | 0.882        | 0.887        | 0.897        | 0.920        | 0.506                    | 0.499                    | 3.733                   | 3.745                   |
| P6               | 3.788        | 4.000        | 0.891        | 0.981        | 0.922        | 0.962        | 0.828        | 0.943        | 0.937        | 0.943        | 0.870        | 0.926        | 0.725                    | 0.802                    | 3.892                   | 3.987                   |
| P7               | 3.345        | 3.574        | 0.906        | 0.896        | <b>0.718</b> | <b>0.887</b> | 0.671        | 0.826        | 0.888        | 0.909        | 0.600        | 0.765        | 0.543                    | 0.515                    | 3.440                   | 3.556                   |
| P8*              | 3.000        | 3.083        | 0.333        | 0.359        | 0.821        | 0.769        | 0.308        | 0.231        | 0.837        | 0.740        | 0.889        | 0.200        | 0.598                    | 0.635                    | 3.617                   | 3.435                   |
| P9               | <b>3.821</b> | <b>3.407</b> | 0.961        | 0.957        | <b>0.892</b> | <b>0.623</b> | 0.863        | 0.580        | 0.894        | 0.835        | 0.927        | 0.738        | 0.730                    | 0.661                    | <b>3.826</b>            | <b>3.471</b>            |
| <i>P10</i>       | <i>3.652</i> | <i>3.796</i> | <i>0.962</i> | <i>0.950</i> | <i>0.861</i> | <i>0.950</i> | <i>0.823</i> | <i>0.888</i> | <i>0.689</i> | <i>0.767</i> | <i>0.600</i> | <i>1.000</i> | <i>0.679</i>             | <i>0.688</i>             | <i>3.711</i>            | <i>3.865</i>            |
| P11              | 3.870        | 3.958        | 0.951        | 0.965        | 0.951        | 0.953        | 0.902        | 0.929        | 0.899        | 0.840        | 0.974        | 1.000        | 0.697                    | 0.798                    | 3.878                   | 3.935                   |
| P12 <sup>^</sup> | 3.755        | 3.525        | 0.989        | 0.897        | 0.848        | 0.805        | 0.837        | 0.724        | 0.802        | 0.718        | 0.923        | 0.917        | <b>0.805</b>             | <b>0.616</b>             | 3.755                   | 3.560                   |
| P13              | 3.866        | 3.943        | 0.979        | 0.957        | 0.964        | 0.957        | 0.943        | 0.913        | 0.954        | 0.966        | 0.898        | 0.967        | 0.890                    | 0.803                    | 3.922                   | 3.967                   |
| P14              | 3.917        | 3.925        | 0.963        | 0.965        | 0.944        | 0.957        | 0.916        | 0.930        | 0.972        | 0.959        | 0.970        | 1.000        | 0.663                    | 0.679                    | 3.916                   | 3.981                   |
| <i>P15</i>       | <i>3.559</i> | <i>3.635</i> | <i>0.898</i> | <i>0.980</i> | <i>0.847</i> | <i>0.765</i> | <i>0.746</i> | <i>0.745</i> | <b>0.701</b> | <b>0.862</b> | <i>0.875</i> | <i>0.522</i> | <i>0.717</i>             | <i>0.693</i>             | <i>3.860</i>            | <i>3.769</i>            |
| <i>P16</i>       | <i>3.897</i> | <i>3.898</i> | <i>0.951</i> | <i>0.923</i> | <i>0.975</i> | <i>0.945</i> | <i>0.926</i> | <i>0.879</i> | <i>0.929</i> | <i>0.947</i> | <i>1.000</i> | <i>0.981</i> | <i>0.814</i>             | <i>0.790</i>             | <i>3.963</i>            | <i>3.975</i>            |
| P17 <sup>^</sup> | 3.346        | 3.264        | 0.690        | 0.770        | 0.714        | 0.805        | 0.536        | 0.655        | 0.947        | 0.900        | 0.688        | 0.960        | 0.491                    | 0.585                    | 3.716                   | 3.831                   |
| P18 <sup>^</sup> | <b>2.767</b> | <b>3.261</b> | 0.809        | 0.742        | <b>0.478</b> | <b>0.697</b> | 0.383        | 0.530        | <b>0.683</b> | <b>0.892</b> | 0.220        | 0.597        | 0.507                    | 0.571                    | <b>2.986</b>            | <b>3.400</b>            |
| P19*             | 3.022        | 2.888        | 0.074        | 0.062        | 0.862        | 0.778        | 0.064        | 0.037        | 0.667        | 0.562        | 1.000        | n.a.         | 0.715                    | 0.681                    | 3.107                   | 3.309                   |
| P20              | 3.526        | 3.656        | 0.893        | 0.843        | 0.827        | 0.916        | 0.720        | 0.759        | 0.883        | 0.906        | 0.903        | 0.818        | 0.678                    | 0.669                    | 3.727                   | 3.847                   |

### Data Summary

|        |       |       |       |       |       |       |       |       |       |       |       |       |       |       |       |       |
|--------|-------|-------|-------|-------|-------|-------|-------|-------|-------|-------|-------|-------|-------|-------|-------|-------|
| mean   | 3.507 | 3.539 | 0.815 | 0.810 | 0.828 | 0.847 | 0.689 | 0.694 | 0.841 | 0.861 | 0.806 | 0.802 | 0.665 | 0.663 | 3.680 | 3.700 |
| SD     | 0.414 | 0.364 | 0.240 | 0.243 | 0.138 | 0.113 | 0.245 | 0.247 | 0.105 | 0.100 | 0.223 | 0.234 | 0.116 | 0.089 | 0.288 | 0.245 |
| min    | 2.466 | 2.851 | 0.074 | 0.062 | 0.478 | 0.623 | 0.064 | 0.037 | 0.667 | 0.562 | 0.220 | 0.200 | 0.475 | 0.499 | 2.986 | 3.227 |
| max    | 3.917 | 4.000 | 0.989 | 0.981 | 0.975 | 0.973 | 0.943 | 0.943 | 0.972 | 0.966 | 1.000 | 1.000 | 0.890 | 0.803 | 3.979 | 3.987 |
| a.m.d. | 0.180 |       | 0.035 |       | 0.102 |       | 0.088 |       | 0.067 |       | 0.185 |       | 0.054 |       | 0.137 |       |

Note. ID = participant identifier; CS = Communicative Success; Cv1 = conversation 1; Cv2 = Conversation 2; SV(O) = Subject+Verb+(Object, if required); REL = Relevance in SV(O) sentence frame; CU = Complete Utterance; GR = Grammaticality; REF = Referential Cohesion; %CIU<sub>c</sub> = %Correct Information Units in Conversation; GCS<sub>c</sub> = Global Coherence Scale in Conversation; **bold = difference exceeds 10%, or .3 for CS and GCS, not marked for CU and REF**; *italics = minimal aphasia*; <sup>^</sup> = moderate fluent aphasia; \* = moderate nonfluent aphasia; n.a. = not applicable/no occurrences; SD = standard deviation; min = min score for measure; max = maximum score for measure; a.m.d. = absolute mean difference between the two samples.
