# Supplementary material
Source: publisher figshare collection journal article supplement (https://asha.figshare.com/articles/dataset/_/16569360)
Supplement: Supplementary file 4 [file 1]

### Supplemental Material S7.

#### *M-PWoAs: Group Discourse Data for Visit 1*

| Measure              | Conversation |           | SNM       |           |
|----------------------|--------------|-----------|-----------|-----------|
|                      | $\bar{x}$    | <i>SD</i> | $\bar{x}$ | <i>SD</i> |
| CS                   | 3.99         | .02       | 3.97      | .04       |
| SV(O)                | .983         | .02       | .952      | .03       |
| REL                  | .997         | .01       | .964      | .04       |
| CU                   | .980         | .02       | .920      | .06       |
| GR                   | .983         | .02       | .955      | .04       |
| REF                  | .999         | .01       | 1.00      | .00       |
| %CIUconv<br>and %CIU | .835         | .04       | .877      | .05       |
| GCSconv<br>and GCS   | 3.99         | .02       | 3.88      | .16       |

*Note.* M-PWoA = matched participant without aphasia; SNM = story narrative monologue;  $\bar{x}$  = mean; *SD* = standard deviation; CS = Communicative Success; SV(O) = Subject+Verb+(Object, if required); REL = Relevance in the SV(O) sentence frame; CU = Complete Utterance; GR = Grammaticality; REF= Referential Cohesion; %CIUconv and %CIU = percent Correct Information Unit in Conversation and percent Correct Information Unit; GCSconv and GCS = Global Coherence Scale in Conversation and Global Coherence Scale.
