# Supplementary material
Source: publisher figshare collection journal article supplement (https://asha.figshare.com/articles/dataset/_/16569360)
Supplement: Supplementary file 5 [file 1]

## Supplemental Material S6.

### *Conversation and Story Narrative Monologue Samples for Three Participants*

#### **P7, Mild Anomia: Conversation Sample**

1. P: So, what are your interests now {hands out}?
2. A: Well[W], in[W] my[W] opinion[W] {lifts hands}, I[W][CIU] would[W][CIU] love[W][CIU] to[W][CIU] do[W][CIU] it[W][CIU] <again[W][CIU]> because[W][CIU] like[W] my[W] {gestures to self} my[W][CIU] everything[W][CIU] [CS3][SV+][REL+][CU+][GR+][REF+][GCS3].
3. P: <Mhm>.
4. A: But[W] (um) you[W] know[W] {gestures with one hand} during[W] before[W][CIU] my[W][CIU] stroke[W][CIU] I[W] I[W][CIU] was[W][CIU] (uh) involved[W][CIU] with[W][CIU] like[W] (uh) <editing[W][CIU]> {counts on fingers} (um) and[W] (um) and[W] (uh) *formatting*[W][CIU] because[W] (:03) my[W] (uh) (:02) my[W] (uh) [IUAB][CS3][SV-][REL+][CU-][GR+].
5. P: <Mhm>.
6. A: What[W] is[W] it[W] (um uh) [PERF][CS4][SV+][REL+][CU+][GR+][REF+].
7. A: Not[W][CIU] my[W][CIU] colleagues[W][CIU] but[W][CIU] (um uh) {looking up, thinking} (uh luh\* um uh) [IUAB][CS3][GR+].
8. A: Oh[W] God[W] [CS4].
9. A: (Um) (:04) (uh) my[W][CIU] (uh t\* ts\*) {gestures to self} (luh\* uh\* s\*) something[W] {gestures} [CS1][GR+][GCS1].
10. A: Ok?
11. P: Clients {hands up}?
12. A: Clients {smiles}! [not coded immediate repetition of partner's provided word].
13. A: Perfect[W][CIU] {thumbs up} [CS4][GCS4].
14. A: Exactly {points at P, small laugh}.
15. A: (Um uh) clients[W]† {quietly to herself}.
16. A: It's[W][W] like[W] you[W] know[W] I[W][CIU] said[W][CIU] to[W][CIU] you[W] everyone[W] it's[W][W] like[W] "I[W][CIU] can[W][CIU] do[W][CIU] anything[W][CIU]" {gestures} [CS2][SV+][REL+][CU+][GR+][GCS2].
17. P: Mhm.
18. A: I[W][CIU] can[W][CIU] you[W] know[W] {gesturing} because[W][CIU] you're[W][W][CIU] busy[W][CIU] [CS2][SV+][REL+][CU+][GR+][GCS2].
19. A: I'm[W][W] I'm[W][CIU][W][CIU] {gestures to self} very[W][CIU] as[W][CIU] well[W][CIU] [CS2][SV-][REL+][CU-][GR+][GCS2].
20. A: But[W] it's[W] [W] like[W] "you're[W][W] you're[W][W][CIU] busy[W][CIU]" {gesturing} [CS2][SV+][REL-][CU-][GR+][GCS2].
21. A: "I[W][CIU] can[W][CIU] do[W][CIU] everything[W][CIU]" [CS3][SV+][REL+][CU+][GR+][GCS2].
22. A: "You[W][CIU] can[W][CIU]" [CS2][SV+][REL+][CU+][GR+][GCS2].
23. A: And[W] then[W][CIU] they[W] said[W][CIU] "Ok[W], you[W][CIU] can[W][CIU] <edit[W][CIU]>" (um) and[W] {gesturing around} do[W] this[W] [CS3][SV+][REL-][CU-][GR+][REF-][GCS3].
24. P: <Mhm>.
25. A: And[W] I'm[W][CIU][W][CIU] fine[W][CIU] with[W][CIU] it[W][CIU] {gesturing} [CS3][SV+][REL+][CU+][GR+][REF+][GCS4].
26. A: And[W] I'm[W][W] I[W][CIU] did[W][CIU] it[W][CIU] {gesturing} [CS4][SV+][REL+][CU+][GR+][REF+][GCS4].

27. P: Oh that’s great.
28. A: I[W][CIU] said[W][CIU] “I’d[W][CIU][W][CIU] love[W][CIU] to[W][CIU]” [CS4][SV+][REL+][CU+][GR+][GCS4].
29. A: I[W] love[W] to[W] (uh uh uh) I[W] love[W] to[W] (um) [IUAB][CS2][SV-][REL+][CU-][GR+].
30. A: Of[W] course[W] my[W] old[W] my[W][CIU] old[W][CIU] job[W][CIU] {gestures away} [IUAB][CS2][GR+].

### P7 Story Narrative Monologue Sample

1. P: <Mhm>.
2. A: And[W] the[W][CIU] family[W][CIU] came[W][CIU] into[W][CIU] the[W][CIU] park[W][CIU] and[W] (uh) decided[W][CIU] to[W][CIU] go[W][CIU] to[W][CIU] the[W][CIU] picnic[W][CIU] [CS4][SV+][REL+][CU+][GR+][GCS4].
3. A: And[W] and[W] (uh) they[W][CIU] were[W][CIU] very[W][CIU] excited[W][CIU] [CS4][SV+][REL+][CU+][GR+][REF+][GCS4].
4. A: (Uh) the[W][CIU] family[W][CIU], the[W] (um) the[W][CIU] children[W][CIU] (um) are[W][CIU] <playing[W][CIU]>, swimming[W][CIU], et[W][CIU] cetera[W][CIU] et[W][CIU] cetera[W][CIU] [CS4][SV+][REL+][CU+][GR+][GCS4].
5. P: <Mhm>.
6. A: But[W][CIU] the[W] baby[W] (:03) the[W][CIU] baby[W][CIU] is[W][CIU] <crying[W][CIU]> because[W][CIU] what[W][CIU] happened[W][CIU] to[W][CIU] her[W][CIU] [CS4][SV+][REL+][CU+][GR+][REF+][GCS4]?
7. P: <Mhm>.
8. A: And[W] everyone[W][CIU] is[W][CIU] you[W] know[W] I[W] I[W] believe[W] they[W] didn’t[W][W] love[W] her[W] anymore[W] {laughs} [CS4][SV+][REL-][CU-][GR+][REF+][GCS2].
9. A: She[W][CIU] was[W] (uh) the[W][CIU] baby[W][CIU] is[W][CIU] (um) (:03) (um) (:03) alone[W][CIU] [CS4][SV+][REL+][CU+][GR+][REF+][GCS4].
10. P: Mhm.
11. A: And[W] (:03) I[W] think[W] she[W][CIU] was[W][CIU] a[W][CIU] little[W][CIU] bit[W][CIU] hungry[W][CIU] [CS4][SV+][REL+][CU+][GR+][REF+][GCS4].
12. P: {Little laugh}.
13. A: (Um) she[W][CIU] was[W][CIU] (um) deciding[W][CIU] you[W] know[W] (:03) to[W][CIU] have[W][CIU] (um) (:03) (uh) a[W] <a[W][CIU] flower[W][CIU]> to[W] to[W][CIU] eat[W][CIU] [CS4][SV+][REL+][CU+][GR+][REF+][GCS4].
14. P: <{Laugh}>.
15. P: Okay.
16. A: And[W] they’re[W][W] her[W][CIU] family[W][CIU] were[W][CIU] you[W] know[W] playing[W][CIU] (um) and[W] deciding[W][CIU] to[W][CIU] eat[W][CIU] [CS4][SV+][REL+][CU+][GR+][REF+][GCS4].
17. P: Mhm.
18. A: The[W][CIU] baby[W][CIU] is[W][CIU] (um) eating[W][CIU] <flowers[W][CIU]> because[W][CIU] she[W][CIU] was[W][CIU] very[W][CIU] hungry[W][CIU] [CS4][SV+][REL+][CU+][GR+][REF+][GCS4].
19. P: <Mhm>.
20. A: But[W][CIU] all[W][CIU] of[W][CIU] a[W][CIU] sudden[W][CIU], mother[W][CIU] and[W] the[W][CIU] <father[W][CIU]>, and[W] the[W][CIU] grandmother[W][CIU] and[W] <grandfather[W][CIU]> are[W][CIU] (s\* s\*) it’s[W][W] like[W][CIU] “oh[W] the[W][CIU] <baby[W][CIU] is[W][CIU] gone[W][CIU]>!” [CS4][SV+][REL+][CU+][GR+][GCS4].
21. P: <Mhm>.
22. A: “The[W][CIU] <baby[W][CIU] is[W][CIU] gone[W][CIU]>!” [CS4][SV+][REL+][CU+][GR+][GCS4].
23. P: <Mhm>.

24. P: <Mhm>.
25. A: They[W][CIU] are[W][CIU] (um) looking[W][CIU] and[W] looking[W][CIU] and[W] looking[W][CIU] for[W][CIU] the[W][CIU] baby[W][CIU] [CS4][SV+][REL+][CU+][GR+][REF+][GCS4].
26. A: And[W] they[W][CIU] left[W][CIU] to[W][CIU] (uh) find[W][CIU] the[W][CIU] baby[W][CIU] [CS4][SV+][REL+][CU+][GR+][REF+][GCS4].
27. P: Mhm.
28. A: And[W] the[W][CIU] baby[W][CIU] is[W] (e\* e\*) just[W][CIU] <ate[W][CIU]> and[W] relaxing[W][CIU] [CS4][SV+][REL+][CU+][GR-][GCS4].
29. P: <{Laugh}>.
30. A: But[W][CIU] she's[W][CIU][W][CIU] a[W][CIU] little[W][CIU] bit[W][CIU] <you[W]> know[W] <sad[W][CIU]> for[W][CIU] her[W][CIU] family[W][CIU] [CS4][SV+][REL+][CU+][GR+][REF+][GCS4].
31. P: <Mhm>.
32. P: <Mmm>.
33. A: And[W] they[W][CIU], the[W][CIU] family[W][CIU], are[W][CIU] (um) find[W] (um) looking[W][CIU] to[W][CIU] <find[W][CIU] the[W][CIU] baby[W][CIU]> {turns pages back and forth} [CS4][SV+][REL+][CU+][GR+][REF+][GCS4].

### **P8 Moderate Transcortical Motor Aphasia: Conversation**

1. P: There are so many cats in the *Twin Cities*!
2. A: <Oh>.
3. A: <Oh>.
4. P: Like if you.
5. P: Especially *St. Paul*, if you drive around you just see all these cats.
6. A: Oh.
7. P: And it's because they're not getting spayed and neutered.
8. A: Yeah.
9. P: So there's just stray cats just throughout the city.
10. A: Oh.
11. P: Like especially *St. Paul* I feel like.
12. A: {Nodding}.
13. P: It's kinda sad.
14. A: Yeah.
15. P: Cuz they're just out and about.
16. P: And they don't have a home.
17. A: Yeah.
18. P: Yeah.
19. P: Any other pets or just *Daffodil* {A:'s pet}?
20. A: And[W] (um) an[W][CIU] old[W][CIU] *collie*[W][CIU] [CS4][GR+][GCS4].
21. P: Mhm.
22. A: Fifteen[W][CIU] [SV-][REL+][CU-][CS4].
23. P: Oh wow.
24. A: Yeah.
25. P: I love *collies*.
26. A: {Laughs}.
27. P: They're so cute.

28. P: (Um) any like (uh) (:02) like *barking*?
29. A: Well[W], some[W][CIU] [CS4][GR+][GCS4].
30. P: {Laughs} just some.
31. P: Yeah.
32. P: I feel like I'm lucky.
33. P: (Um) my dog, her name's *Saturn*.
34. A: Oh.
35. P: *It's my favorite planet* {laughs}.
36. P: Her name is *Saturn*.
37. P: (Um) she doesn't really bark <unless> she's really scared.
38. A: <Oh>.
39. P: And then she'll bark, but.
40. P: I don't know.
41. P: I don't know what I'd do without a dog at home.
42. P: Like it's just very <comforting> and always so excited to see you when you get home.
43. A: <Yeah>.
44. A: Yeah.
45. P: It's nice.
46. P: (:03).
47. P: Do you have any children that live at home or?
48. A: No.
49. P: No.
50. A: One[W][CIU] person[W][CIU] lives[W][CIU] in[W][CIU] (um) *Saint*[W][CIU] *Paul*[W][CIU] {gesturing away} [CS3][SV+][REL-][CU-][GR+][GCS3].
51. A: (Um) *thirty*[W][CIU] *six*[W][CIU] [CS4][SV-][REL+][CU-][GR+][GCS3].
52. P: Oh ok.
53. A: And[W] in[W] *golf*[W][CIU] *club*[W][CIU] (um) [CS3][SV-][REL+][CU-][GR+][GCS3].
54. A: It's[W][W][CIU] a[W][CIU] *golf*[W][CIU] *club*[W][CIU] [CS3][SV-][REL+][CU-][GR+][REF-][GCS3].
55. A: And[W] (um) *Cedar*[W][CIU] *Woods*[W][CIU] {name of *golf club*} [CS3][GR+][GCS3].
56. P: Uhhuh.
57. A: Yeah.
58. P: Is that.
59. P: Does he work at *Cedar Woods*?
60. A: Yeah.
61. P: Gotchya.
62. P: *It's a beautiful golf course*.
63. A: Yeah.
64. P: Yeah.
65. P: I like it there.
66. P: I I wanted to move into the (si\*) the city for a bit.
67. P: But it never happened.
68. A: Yeah.
69. P: And now it's.
70. P: Now I don't live there.
71. P: And that's ok.

72. A: Yeah.
73. P: It's a little hectic.
74. A: Yeah.
75. P: (Ar\*).
76. P: I'm from like right around *Minneapolis*.
77. P: I'm not sure if you're from this area or not.
78. A: *Minneapolis*[W][CIU] (um) is[W][CIU] around[W][CIU] *Minneapolis*[W] (um) [CS3][SV-][REL+][CU-][GR+][GCS3].
79. A: In[W][CIU] city[W][CIU] [CS3][SV-][REL+][CU-][GR-][GCS3].
80. A: So[W] (uh) {shrugs} [IUEL].
81. A: And[W] then[W] it's[W][W][CIU] (uh) city[W][CIU] and[W] (um) *sixth*[W][CIU] and[W] *Oak*[W][CIU] or[W][CIU] something[W][CIU] [CS3][SV+][REL-][CU-][GR-][REF-][GCS3].
82. A: Yeah.
83. P: So you lived in the city?
84. A: Yeah.

### **P8 Moderate Transcortical Motor Aphasia: Story Narrative Monologue**

1. A: So[W] (um) so[W] (um :03) it's[W][CIU][W][CIU] car[W][CIU]\*\* and[W] (um :02) and[W] all[W] and[W] (uh\*) whole[W][CIU] bunch[W][CIU] of[W][CIU] people[W] {gesturing around to all of the mice in the truck; mice are anthropomorphized, so people was accepted after first occurrence for all study participants} [CS2][SV+][REL-][CU-][GR-][GCS2].
2. A: And[W] (um\*) and[W] then[W] {points to mouse bouncing out on next page} drops[W][CIU] him[W][CIU] off[W] [CS2][SV-][REL-][CU-][REF-][GR+][GCS2].
3. A: But[W] (um) but[W] no[W] [CS2][GCS2]!
4. A: Drops[W][CIU] him[W][CIU] off[W] [CS2][SV-][REL-][CU-][GR+][REF+][GCS2].
5. A: Yeah.
6. A: And[W] (um) bear[W] {points to stuffed animal mouse} [CS2][SV-][REL-][CU-][GR-][GCS2].
7. A: {Turns 2 pages} and[W] drops[W][CIU] him[W][CIU] off[W] [CS2][SV-][REL-][CU-][GR+][GCS2].
8. A: And[W] all[W] [CS1][SV-][REL-][CU-][GR-][GCS1].
9. A: {Now looking at pond page} (um) go[W][CIU] swimming[W][CIU] [CS3][SV-][REL+][CU-][GR-][GCS3].
10. A: And[W] (:02) catching[W][CIU] {has turned page, looking at baseball picture} (um) [CS2][SV-][REL+][CU-][GR-][GCS2].
11. A: But[W] (um) but[W] then[W] where's[W][CIU][W][CIU] the[W] (um) [IUAB][CS2][SV-][REL+][CU-][GR+].
12. A: I[W] don't[W][W] know[W] [PERF][CS4][SV+][REL-][CU-][GR+][GCS1].
13. A: (Um) Nat[W] (um) {names the mouse Nat using the name she read in the dedication on page 1} [CS1][GCS1].
14. A: And[W] then[W] {sighs} (:04) [IUAB][CS1][SV-][REL-][CU-][GR+].
15. A: Yeah.
16. A: {Skips a page} and[W] Nat[W][CIU] (um) picnic[W] picnic[W][CIU] {gesturing in circles to whole scene} [CS2][SV-][REL+][CU-][GR-][GCS2].
17. A: And[W] [CS1][SV-][REL-][CU-][GCS1].
18. A: But[W] (um) berry[W][CIU] {points to page where mouse picks berries} [CS2][SV-][REL+][CU-][GR-][GCS2].
19. A: And[W] (um) and[W] {gestures small circles above mouse eating raspberries on right side of two page spread, then sighs} (:02) berry[W][CIU] [CS2][SV-][REL+][CU-][GR-][GCS2].
20. A: Yes.

21. A: And[W] so[W] many[W][CIU] people[W][CIU] {gesturing to both pages; mice are anthropomorphized, so people was accepted after first occurrence for all study participants} [CS2][SV-][REL+][CU-][GR+][GCS1].
22. A: (:02) But[W][CIU] "where's[W][CIU][W][CIU] (um) {pointing to the mice on left page looking for baby mouse} nut[W] Nat[W] Nat[W][CIU][W][CIU]" [CS4][SV+][REL+][CU+][GR+][GCS4]?
23. A: And[W] keep[W] people[W][CIU] calling[W][CIU] {next page, pointing to mouse calling} [CS3][SV+][REL+][CU+][GR-][GCS4].
24. A: And[W] (um) frog[W][CIU] {points to frog} [CS4][SV-][REL+][CU-][GR-][GCS2].
25. A: And<sup>+</sup> (um) {turns attention to picture of adult and child mouse, gesturing to that picture says this and then turns page} [CS1][SV-][REL-][CU-][GCS1].
26. A: And[W] then[W] {now she's on next page looking at new information} Nat[W][CIU] {points to mouse lying down with full belly} [CS2][SV-][REL+][CU-][GR+][GCS1].
27. A: {Skips page} and[W] then[W], "over[W][CIU] here[W][CIU]" {points to mouse seeing the truck, gestures between the two} [CS2][SV-][REL+][CU-][GR-][GCS2].
28. A: Yeah.
29. A: Nat[W][CIU] [CS2][SV-][REL+][CU-][GCS1].
30. A: {Next page where mice are hugging, gestures to both pages} and[W] (uh) [CS1][SV-][REL-][CU-][GCS1].
31. A: Nat[W][CIU] is[W][CIU] ok[W][CIU] {has turned to last page, gesturing around final picnic scene} [CS4][SV+][REL+][CU+][GR+][GCS4].

#### **P12 Moderate Conduction Aphasia: Conversation**

1. P: So is it like *East Africa*?
2. P: That's where I wanna go.
3. P: (Um).
4. A: I[W][CIU] think[W][CIU] that's[W][CIU][W][CIU] it[W][CIU] [CS4][SV+][REL+][CU+][GR+][REF+][GCS4].
5. P: Like (um) <*Kenya*>.
6. A: <The name of it> {cannot analyze, interrupted}.
7. A: Yes.
8. A: <That[W][CIU] one[W][CIU]> [CS4][GR+][GCS4].
9. P: <*Tanzania*>.
10. A: Yes.
11. P: *Ethiopia*.
12. A: Yeah.
13. A: <That> {cannot analyze, interrupted}.
14. P: <I'm assuming that's>.
15. A: Yeah.
16. A: I[W][CIU] think[W][CIU] it's[W][CIU][W][CIU] those[W][CIU] three[W][CIU] maybe[W][CIU] [CS4][SV+][REL+][CU+][GR+][REF+][GCS4].
17. A: <Maybe[W][CIU] it's[W][CIU][W][CIU] some[W][CIU] of[W][CIU] those[W][CIU]>, I[W][CIU] think[W][CIU] [CS4][SV+][REL+][CU+][GR+][REF+][GCS4].
18. P: <Those are>.
19. P: I feel like those are the most popular <in> terms of like *the Serengeti* and <all of those kinda>.
20. A: <Yeah>.
21. A: It's[W][CIU][W][CIU] not[W][CIU] *the*[W][CIU] *Serengeti*[W][CIU] [CS4][SV+][REL+][CU+][GR+][REF+][GCS4].
22. P: Not that one?

23. A: I[W][CIU] think[W][CIU] it's[W][CIU][W][CIU] those[W][CIU] three[W][CIU] ones[W][CIU] that[W][CIU] what[W][CIU] you[W][CIU] said[W][CIU] [CS4][SV+][REL+][CU+][GR+][REF+][GCS4].
24. P: Oh (ar\*).
25. P: I feel like they're the most popular <in terms of>.
26. A: <Yeah>.
27. P: Unless you're going to like <you know, the *volcanoes*>.
28. A: <(A\*) and[W] I[W][CIU] think[W][CIU] the[W]> the[W] end[W] was[W][CIU] gonna[W][CIU][W][CIU] be[W][CIU] right[W][CIU] near[W][CIU] (uh) lake[W] or[W][CIU] the[W][CIU] water[W][CIU] [CS3][SV+][REL+][CU+][GR-][GCS3].
29. P: Oh.
30. A: I[W][CIU] think[W][CIU] we're[W][CIU][W][CIU] gonna[W][CIU][W][CIU] be[W][CIU] there[W] [CS3][SV+][REL-][CU-][GR+][REF-][GCS3].
31. P: Is is the end.
32. A: It[W][CIU] looks[W][CIU] beautiful[W][CIU] when[W][CIU] I[W][CIU] look[W][CIU] at[W][CIU] it[W][CIU] [CS4][SV+][REL+][CU+][GR+][REF+][GCS4].
33. P: Some sort of beach.
34. A: Yeah.

#### **P12 Moderate Conduction Aphasia: Story Narrative Monologue**

1. A: And[W] she[W][CIU] does[W][CIU] not[W][CIU] feel[W][CIU] well[W] [CS4][SV+][REL+][CU+][GR+][REF+][GCS4].
2. A: No.
3. A: She[W][CIU] feels[W][CIU] bad[W] cause[W][CIU] she[W][CIU] doesn't[W][CIU][W][CIU] know[W][CIU] where[W][CIU] she[W][CIU] is[W][CIU] [CS4][SV+][REL+][CU+][GR+][REF+][GCS4].
4. A: So[W] but[W] there's[W][W] some[W] things[W] up[W] with[W] a[W] red[W] red[W] [CS1][SV+][REL-][CU-][GR-][GCS1].
5. A: And[W] she's[W][W] (um) (:04) [IUAB][CS1][SV-][REL+][CU-][GR+][REF+].
6. A: It's[W][W] this[W] {pointing to berries} with[W] the[W] color[W] of[W] that[W] {pointing to berry bush on previous page} [PERF][CS1][SV+][REL-][CU-][GR+][REF-][GCS1].
7. A: And[W] I[W] don't[W][W] remember[W] that [PERF][CS3][SV+][REL-][CU-][GR+][REF+][GCS1].
8. A: It[W] is[W] a[W] a[W] (fr\* fra\* fr\* fr\* fr\*) (hm) {shakes head and continues on} [IUAB][CS1][SV-][REL-][CU-][GR+][REF+].
9. A: Alright[W] so[W][CIU] now[W][CIU] the[W][CIU] kids[W][CIU] {mice are anthropomorphized, the term kids accepted for all participants in the study} (:02) lake[W][CIU] [CS4][SV+][REL+][CU+][GR+][GCS4].
10. A: And[W] there's[W][W] playing[W][CIU] (p\*) pool[W][CIU] [CS3][SV+][REL-][CU-][GR-][GCS3].
11. A: (Um) one[W][CIU] of[W][CIU] them[W][CIU] is[W][CIU] playing[W] playing[W][CIU] with[W] a[W] with[W] a[W] (:03) pool[W][CIU] {quietly to self} with[W][CIU] a[W][CIU] (ba\*) boat[W][CIU] [CS4][SV+][REL+][CU+][GR+][REF+][GCS4].
12. A: (Um) ok.
13. A: So[W] now[W][CIU] the[W][CIU] kids[W][CIU] about[W][CIU] to[W][CIU] eat[W][CIU] [CS4][SV+][REL+][CU+][GR-][GCS4].
14. A: The[W][CIU] father[W][CIU] is[W][CIU] holding[W][CIU] the[W] the[W][CIU] mehlk[W][CIU] {one sound error, interpretable in context as milk} (:02) [CS4][SV+][REL+][CU+][GR+][GCS4].
15. A: (Um) the[W][CIU] grandma[W][CIU] is[W][CIU] holding[W][CIU] (:02) with[W] a[W] with[W] a[W] camera[W][CIU] [CS4][SV+][REL+][CU+][GR-][GCS4].

16. A: Alright[W] (um) (:02) they're[W][CIU][W][CIU] going[W][CIU] to[W][CIU] eat[W][CIU] (um) cheese[W][CIU], (s\*) salat[W][CIU] {one sound error, interpretable in context as salad} (um) (s\* s\* s\*) with[W] (s\* s\*) (:02) [CS3][SV+][REL+][CU+][GR-][REF+][GCS4].
17. A: I[W] love[W] to[W] drink[W] that[W] [PERF][CS4][SV+][REL-][CU-][GR+][REF-][GCS1].
18. A: It†is† (s\* s\* s\* s\* su\* su\*) [IUAB][CS1][SV-][REL-][CU-][GR+][REF+].
19. A: Aw[W] man[W] I[W] can't[W][W] remember[W] the[W] name[W] of[W] this[W] again[W] [PERF][CS4][SV+][REL-][CU-][GR+][REF+][GCS1].
20. A: (S\*) or[W] (sw\* s\*) [IUAB][CS1].
21. A: Aw[W] man[W] I[W] can't[W][W] remember[W] [PERF][CS4][SV+][REL-][CU-][GR+][GCS1].
22. A: Anyway[W] (um) they[W][CIU] have[W][CIU] a[W][CIU] (:02) napkin[W][CIU], (:02) salat[W][CIU] {one sound error, interpretable in context as salad} [CS4][SV+][REL+][CU+][GR+][REF+][GCS4].
23. A No.
24. A: (Sa\* s\* sh\*) with[W] a[W] [IUAB][CS1][SV-][REL-][CU-][GR+].
25. A: My[W] gosh[W] I[W] know[W] this[W] name[W] [PERF][CS4][SV+][REL-][CU-][GR+][GCS1].
26. A: (Um) (:05) alright {no further CIUs coded from this point, as over 300 CIUs have been coded}.
27. A: So she has she she's eating (um) she's eating with a falower I think [CS4][SV+][REL+][CU+][GR-][REF+][GCS4].
28. A: Oh gosh [PERF][CS4][GR+][GCS1].
29. A: Alright so now they're find out where her where their little girl is [CS4][SV+][REL+][CU+][GR-][REF+][GCS4].
30. A: And they're all looking [CS4][SV+][REL+][CU+][GR+][REF+][GCS4].
31. A: And the little kids are like they don't feel well because they can't see her [CS3][SV+][REL+][CU+][GR+][REF+][GCS4].

*Note.* Samples approximately 30-35 lines of each sample are provided as an example of transcripts for participants with varied types/severities of aphasia. Samples started within 5 lines of the end of the reliability portion so as to begin at a new topic or topic shift to aid the reader; except for P7's conversation, which is provided from the beginning of the reliability portion to demonstrate coding for CIUs (the required sample of 300-400 CIUs occurred entirely within the reliability portion). For P8, 84 lines are provided in her conversation sample because of her limited verbalizations. Coding is always conducted while watching video recordings. Coders also watched each conversation from the beginning of the recording not the beginning of the transcription which occurs approximately two minutes later. Coders made coding decisions based on all material available (i.e., the transcript, the videorecording, context, etc.). Coding may at times be difficult to interpret without this context used by the coders. [CS] codes = Communicative Success, levels 1, 2, 3, 4; [GCS] codes = Global Coherence Scale for the monologues and Global Coherence Scale in Conversation for the conversations, levels 1, 2, 3, 4. [W] = Word designation per Nicholas & Brookshire (1993) and Leaman & Edmonds, 2019c; [CIU] = Informative Correct Information Unit in monologue and informative Correct Information Unit in Conversation; lack of a [CIU] code indicates the word was not informative; [SV] = Subject+Verb+(Object); [REL] = Relevance of lexical items in the SV(O) sentence frame; [CU] = Complete Utterance; [GR] = Grammaticality; [REF] = Referential Cohesion; Utterance Designator Codes in these samples: [PERF] = Comment on performance or on the picture or a personal statement; [IUAB] = Incomplete Utterance Abandoned; [IUEL] = Incomplete Utterance, Elected {no evidence of lexical retrieval difficulty, seen often in conversation especially with discourse markers at the end of utterances}; {Curly brackets} = transcribers comments; <Triangle brackets> = overlapping speech; *italics* = changed word to preserve privacy of the speaker, a word with similar meaning was substituted; \* = false start; † = CIU or CIUconv coding error, leading to an error rate of .006 (4/675): P7, Conversation, line 15 should not be coded; P8, SNM, line 25 should be coded [W]; P12, SNM, line 18 should be coded [W][W]; \*\* = the word “car” was coded as an acceptable substitute for the pick-up truck in the SNM, because regionally many people use the terms interchangeably, with 65% of the matched participants without aphasia calling the pick-up truck a “car.”
