# Supplementary material
Source: publisher figshare collection journal article supplement (https://asha.figshare.com/articles/dataset/_/16569360)
Supplement: Supplementary file 6 [file 1]

### Supplemental Material S11.

#### *Group Data for People With Aphasia for 4-Point Scale Measures in Each Condition*

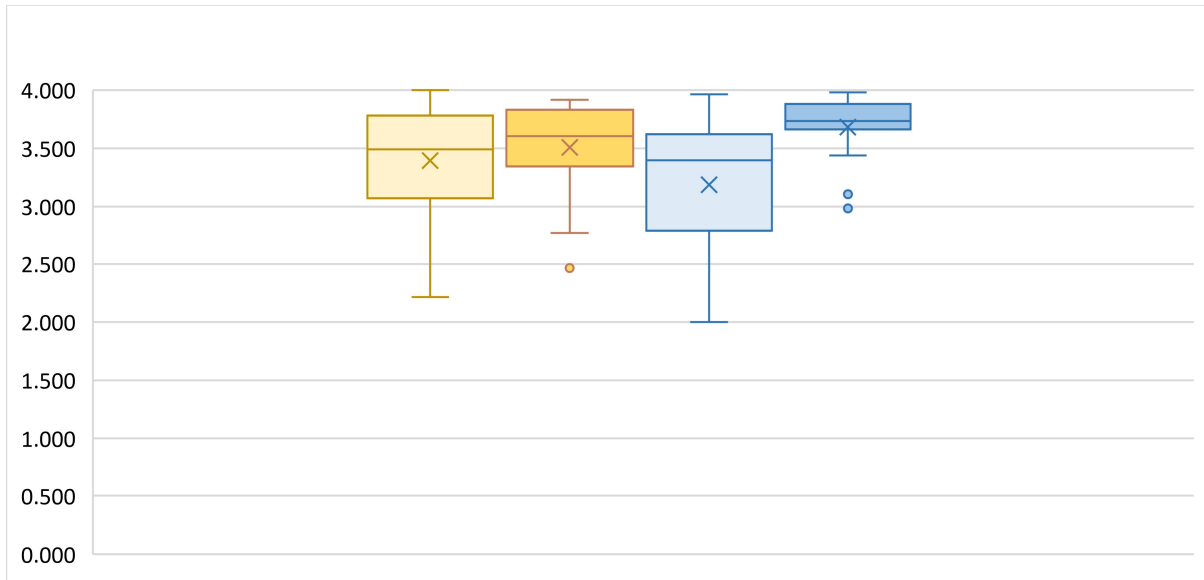

*Note.* y-axis = 0-4 point rating scale; Box plots represent group data for 4-point scale measures. Measures are color coded with lighter color depicting the SNM data and the darker color depicting the unstructured conversational data; Dots represent outliers; X represents the mean for each measure; Yellow = Communicative Success; Blue = the Global Coherence Scale and Global Coherence in Conversation.
