# Supplementary material
Source: publisher figshare collection journal article supplement (https://asha.figshare.com/articles/dataset/_/16569360)
Supplement: Supplementary file 8 [file 1]

## Supplemental Material S1.

### *Story Narrative Monologue Instructions Script and Summary of Stimulus Book, "Picnic"*

---

#### Instructions Script\*

---

"I have two picture books without words. I'd like you to tell me a story to go along with the pictures in each book. Before you tell me each story, I want you to look through the pages of the book to familiarize yourself with the story. You can take however long you want to look at the book. There are no right or wrong ways to tell the story. I am not looking for anything special, I am just interested in hearing the story in your own words. First, to give you an idea of what I want you to do, I have another book we can use as an example. I will look through the pages, and then when I am done, I will tell you the story while looking at the pages of the book again. This will let you see what I want you to do. When I tell the story, I will have a script. This is so I tell it the same way with every person in the study. However, when you tell me the stories from your books, you will tell them to me in your own words. You won't have a script. Do you have any questions?"

---

#### Summary of Picnic

---

"Picnic" tells the story of a family of mice who go on a picnic, yet one of the children falls off the pick-up truck on the way to the picnic location. The family enjoys games and music at their picnic without realizing that one mouse is missing. Meanwhile, the lost mouse is worried about being left behind, but finds comfort in a stuffed animal he was holding when he fell off the truck, and begins to explore the surroundings. The mouse finds berries to eat and eventually falls asleep with a full stomach. Finally, when the mouse family sits down to eat at their picnic, they notice that one mouse is missing. They pack up their picnic, get back in the pick-up truck, and retrace their route, and locate the missing mouse by the side of the road. They are overjoyed to see one another again. The lost mouse realizes that now the stuffed animal mouse is missing, and runs back into the brush by the side of the road, finding the stuffed animal. The family continues on their way, finds a new picnic location, and resumes their picnic with everyone present.

---

*Note.* Picnic, McCully, 1984; \* = task instructions are intended to be relaxed and flexible, modify as needed to ensure the participant understands the instructions.
