# Supplementary material
Source: publisher figshare collection journal article supplement (https://asha.figshare.com/articles/dataset/_/16569360)
Supplement: Supplementary file 9 [file 1]

## Supplemental Material S9.

### *People With Aphasia: Individual Data for Each Measure in Story Narrative Monologues 1 and 2*

| ID           | CS<br>Mon1   | CS<br>Mon2   | SV(O)<br>Mon1 | SV(O)<br>Mon2 | REL<br>Mon1  | REL<br>Mon2  | CU<br>Mon1   | CU<br>Mon2   | GR<br>Mon1   | GR<br>Mon2   | REF<br>Mon1  | REF<br>Mon2  | %CIU<br>Mon1 | %CIU<br>Mon2 | GCS<br>Mon1  | GCS<br>Mon2  |
|--------------|--------------|--------------|---------------|---------------|--------------|--------------|--------------|--------------|--------------|--------------|--------------|--------------|--------------|--------------|--------------|--------------|
| P1           | 3.833        | 3.889        | 0.958         | 0.963         | 0.875        | 0.963        | 0.875        | 0.926        | <b>0.917</b> | <b>0.778</b> | 1.000        | 1.000        | 0.747        | 0.804        | 3.905        | 3.926        |
| P2           | 3.406        | 3.547        | 0.869         | 0.968         | 0.606        | 0.629        | 0.525        | 0.597        | <b>0.951</b> | <b>0.841</b> | <b>0.657</b> | <b>0.796</b> | 0.521        | 0.593        | 2.938        | 3.016        |
| P3           | 2.991        | 3.162        | 0.651         | 0.674         | 0.688        | 0.721        | 0.450        | 0.488        | 0.515        | 0.500        | 0.500        | 0.600        | 0.589        | 0.671        | 3.049        | 3.179        |
| <i>P4</i>    | <b>3.393</b> | <b>3.813</b> | <i>0.815</i>  | <i>0.871</i>  | <i>0.889</i> | <i>0.935</i> | <i>0.704</i> | <i>0.806</i> | <i>0.704</i> | <i>0.750</i> | <i>1.000</i> | <i>0.923</i> | <i>0.809</i> | <i>0.749</i> | <i>3.542</i> | <i>3.742</i> |
| P5^          | 2.962        | 3.030        | <b>0.447</b>  | <b>0.594</b>  | 0.638        | 0.625        | 0.277        | 0.375        | 0.766        | 0.774        | <b>0.214</b> | <b>0.571</b> | 0.571        | 0.535        | 2.647        | 2.875        |
| P6           | 3.587        | 3.477        | 0.756         | 0.705         | <b>0.778</b> | <b>0.886</b> | 0.644        | 0.636        | 0.886        | 0.810        | 0.871        | 0.966        | 0.681        | 0.601        | 3.500        | 3.395        |
| P7           | <b>3.721</b> | <b>3.265</b> | 0.895         | 0.857         | <b>0.816</b> | <b>0.667</b> | 0.763        | 0.548        | 0.837        | 0.854        | <b>1.000</b> | <b>0.706</b> | <b>0.658</b> | <b>0.537</b> | <b>3.357</b> | <b>2.872</b> |
| P8*          | 2.214        | 2.222        | 0.231         | 0.167         | 0.577        | 0.556        | 0.154        | 0.111        | <b>0.500</b> | <b>0.611</b> | 0.500        | n.a.         | 0.430        | 0.500        | <b>2.000</b> | <b>2.706</b> |
| P9           | 3.702        | 3.761        | 0.821         | 0.783         | 0.893        | 0.891        | 0.732        | 0.717        | 0.807        | 0.804        | 0.929        | 0.941        | 0.750        | 0.755        | 3.811        | 3.739        |
| <i>P10</i>   | <i>3.872</i> | <i>3.907</i> | <i>0.957</i>  | <i>1.000</i>  | <i>0.681</i> | <i>0.712</i> | <i>0.681</i> | <i>0.731</i> | <b>0.750</b> | <b>0.547</b> | <i>0.621</i> | <i>0.607</i> | <i>0.761</i> | <i>0.749</i> | <i>3.750</i> | <i>3.704</i> |
| P11          | 3.776        | 3.851        | 0.895         | 0.800         | 0.860        | 0.911        | 0.789        | 0.711        | 0.724        | 0.681        | 0.933        | 0.960        | 0.704        | 0.760        | 3.579        | 3.800        |
| P12^         | 3.300        | 3.051        | 0.850         | 0.817         | 0.663        | 0.595        | 0.563        | 0.492        | 0.779        | 0.717        | 0.897        | 0.826        | <b>0.520</b> | <b>0.661</b> | <b>3.074</b> | <b>2.714</b> |
| P13          | 3.793        | 3.686        | 0.890         | 0.938         | 0.816        | 0.752        | 0.718        | 0.726        | 0.951        | 0.949        | 0.965        | 0.939        | 0.676        | 0.602        | 3.439        | 3.296        |
| P14          | 3.891        | 3.905        | 0.911         | 0.946         | 0.911        | 0.838        | 0.822        | 0.824        | 0.848        | 0.892        | 0.970        | 0.964        | 0.753        | 0.686        | 3.756        | 3.568        |
| <i>P15</i>   | <i>3.576</i> | <i>3.556</i> | <i>0.825</i>  | <i>0.902</i>  | <i>0.714</i> | <i>0.787</i> | <i>0.571</i> | <i>0.738</i> | <b>0.846</b> | <b>0.730</b> | <b>0.686</b> | <b>0.969</b> | <i>0.669</i> | <i>0.662</i> | <i>3.525</i> | <i>3.492</i> |
| <i>P16</i>   | <i>4.000</i> | <i>3.977</i> | <i>0.982</i>  | <i>0.909</i>  | <i>0.964</i> | <i>0.909</i> | <i>0.945</i> | <i>0.818</i> | <i>0.982</i> | <i>0.909</i> | <i>0.973</i> | <i>0.967</i> | <i>0.857</i> | <i>0.901</i> | <i>3.964</i> | <i>3.932</i> |
| P17^         | <b>2.684</b> | <b>3.063</b> | 0.619         | 0.690         | 0.488        | 0.569        | 0.250        | 0.379        | 0.761        | 0.712        | 0.810        | 0.881        | 0.393        | 0.449        | <b>2.193</b> | <b>2.586</b> |
| P18^         | <b>2.760</b> | <b>2.311</b> | <b>0.521</b>  | <b>0.741</b>  | <b>0.604</b> | <b>0.241</b> | 0.292        | 0.155        | 0.816        | 0.750        | 0.536        | 0.441        | 0.430        | 0.410        | 2.356        | 2.052        |
| P19*         | <b>3.098</b> | <b>2.605</b> | 0.022         | 0.040         | <b>0.935</b> | <b>0.733</b> | 0.022        | 0.027        | <b>0.256</b> | <b>0.690</b> | n.a.         | n.a.         | 0.620        | 0.564        | <b>2.580</b> | <b>2.080</b> |
| P20          | <b>3.333</b> | <b>3.848</b> | 0.814         | 0.818         | 0.674        | 0.697        | 0.593        | 0.545        | 0.724        | 0.803        | 0.902        | 0.857        | 0.541        | 0.579        | <b>2.831</b> | <b>3.215</b> |
| Data Summary |              |              |               |               |              |              |              |              |              |              |              |              |              |              |              |              |
| mean         | 3.395        | 3.396        | 0.736         | 0.759         | 0.753        | 0.731        | 0.568        | 0.568        | 0.766        | 0.755        | 0.787        | 0.829        | 0.634        | 0.638        | 3.192        | 3.194        |
| s.d.         | 0.479        | 0.542        | 0.255         | 0.251         | 0.137        | 0.173        | 0.254        | 0.251        | 0.174        | 0.114        | 0.226        | 0.170        | 0.132        | 0.125        | 0.595        | 0.571        |
| min          | 2.214        | 2.222        | 0.022         | 0.040         | 0.488        | 0.241        | 0.022        | 0.027        | 0.256        | 0.500        | 0.214        | 0.441        | 0.393        | 0.410        | 2.000        | 2.052        |
| max          | 4.000        | 3.977        | 0.982         | 1.000         | 0.964        | 0.963        | 0.945        | 0.926        | 0.982        | 0.949        | 1.000        | 1.000        | 0.857        | 0.901        | 3.964        | 3.932        |
| a.m.d.       | 0.192        |              | 0.062         |               | 0.078        |              | 0.073        |              | 0.085        |              | 0.117        |              | 0.058        |              | 0.234        |              |

*Note.* ID = participant identifier; CS = Communicative Success; Mon1 = story narrative monologue visit 1; Mon2 = story narrative monologue visit 2; SV(O) = Subject+Verb+(Object, if required); REL = Relevance in SV(O) sentence frame; CU = Complete Utterance; GR = Grammaticality; REF = Referential Cohesion; %CIU = %Correct Information Units; GCS = Global Coherence Scale; **bold = difference exceeds 10% or .3 for CS and GCS** *italics = minimal aphasia, WAB-AQ > 93.8*; ^ = moderate fluent aphasia; \* = moderate nonfluent aphasia; n.a. = not applicable/no occurrences; s.d. = standard deviation; min = min score for measure; max = maximum score for measure; a.m.d. = absolute mean difference between the two samples.
