# Supplementary material
Source: publisher figshare collection journal article supplement (https://asha.figshare.com/articles/dataset/_/16569360)
Supplement: Supplementary file 10 [file 1]

## Supplemental Material S4.

### Group Age Differences

| Age Differences between groups of SLP-Ps and Participants |                                    |                                        |        |        |         |
|-----------------------------------------------------------|------------------------------------|----------------------------------------|--------|--------|---------|
| Conversation                                              | SLP-P,<br>mean age ( <i>SD</i> )   | Participant,<br>mean age ( <i>SD</i> ) | U      | z      | p-value |
| PWA.Conv 1                                                | 37.4 (10.5)                        | 58.3 (13.5)                            | 27.00  | -4.697 | .000*   |
| PWA.Conv 2                                                | 41.5 (13.2)                        | 58.3 (13.5)                            | 69.00  | -3.552 | .000*   |
| M-PWoA.Conv 1                                             | 36.7 (10.1)                        | 58.2 (13.1)                            | 35.00  | -4.470 | .000*   |
| M-PWoA.Conv 2                                             | 39.5 (12.1)                        | 58.2 (13.1)                            | 58.50  | -3.833 | .000*   |
| Age Differences between groups of SLP-Ps                  |                                    |                                        |        |        |         |
| Conversation                                              | SLP-P 1,<br>mean age ( <i>SD</i> ) | SLP-P 2,<br>mean age ( <i>SD</i> )     | U      | z      | p-value |
| SLP-Ps in PWA<br>conversations                            | 37.4 (10.5)                        | 41.5 (13.2)                            | 223.50 | .640   | .522    |
| SLP-Ps in<br>M-PWoA<br>conversations                      | 36.7 (10.1)                        | 39.5 (12.1)                            | 177.50 | -.611  | .541    |

*Note.* SLP-P = speech language pathologist-partner; *SD* = standard deviation; U = Mann-Whitney test coefficient; z = z-score criterion; PWA.Conv 1 = conversation 1 held by PWAs; \* = significant < .01; PWA.Conv 2 = conversation 2 held by PWAs; M-PWoA.Conv 1 = conversation 1 held by M-PWoAs; M-PWoA. Conv 2 = conversation 2 held by M-PWoAs.
