# Supplementary material
Source: publisher figshare collection journal article supplement (https://asha.figshare.com/articles/dataset/_/16569360)
Supplement: Supplementary file 11 [file 1]

**Supplemental Material S5.**

*Mean Length of Utterance, Type-Token Ratio, and Percent Incomplete Utterances for People With and Without Aphasia in Both Discourse Conditions*

| Demographic Data |             |              |                      | Conversation Data                   |                                     |                                     |                                    | SNM Data                            |                                     |                                     |                                     |
|------------------|-------------|--------------|----------------------|-------------------------------------|-------------------------------------|-------------------------------------|------------------------------------|-------------------------------------|-------------------------------------|-------------------------------------|-------------------------------------|
| ID (Age)         |             | Ed/R         | WAB-R                | PWA                                 |                                     | M-PWoA                              |                                    | PWA                                 |                                     | M-PWoA                              |                                     |
| PWA              | M-PWoA      |              |                      | Visit 1                             | Visit 2                             | Visit 1                             | Visit 2                            | Visit 1                             | Visit 2                             | Visit 1                             | Visit 2                             |
| P1<br>(40)       | M1<br>(43)  | Coll<br>Cauc | 93.5<br>Mild<br>Anom | MLU: 8.26<br>TTR: .37<br>Abn: 7.7%  | MLU: 6.60<br>TTR: .35<br>Abn: 6.3%  | MLU: 10.39<br>TTR: .37<br>Abn: 0.0% | MLU: 8.22<br>TTR: .31<br>Abn: 0.0% | MLU: 7.92<br>TTR: .37<br>Abn: 0.0%  | MLU: 8.39<br>TTR: .40<br>Abn: 0.0%  | MLU: 10.34<br>TTR: .34<br>Abn: 0.0% | MLU: 10.98<br>TTR: .36<br>Abn: 0.0% |
| P2<br>(69)       | M2<br>(71)  | Coll<br>Cauc | 86.0<br>Mild<br>Anom | MLU: 6.18<br>TTR: .35<br>Abn: 1.5%  | MLU: 6.37<br>TTR: .36<br>Abn: 2.9%  | MLU: 9.07<br>TTR: .35<br>Abn: 0.0%  | MLU: 8.94<br>TTR: .39<br>Abn: 1.1% | MLU: 7.12<br>TTR: .27<br>Abn: 0.0%  | MLU: 8.31<br>TTR: .34<br>Abn: 2.9%  | MLU: 8.67<br>TTR: .41<br>Abn: 0.0%  | MLU: 7.65<br>TTR: .35<br>Abn: 0.0%  |
| P3<br>(42)       | M3<br>(45)  | HS<br>CauL   | 77.2<br>Mild<br>Cond | MLU: 2.75<br>TTR: .27<br>Abn: 22.1% | MLU: 2.64<br>TTR: .36<br>Abn: 12.3% | MLU: 8.05<br>TTR: .31<br>Abn: 0.0%  | MLU: 9.00<br>TTR: .28<br>Abn: 0.0% | MLU: 4.58<br>TTR: .31<br>Abn: 9.5%  | MLU: 5.20<br>TTR: .28<br>Abn: 12.5% | MLU: 13.57<br>TTR: .39<br>Abn: 0.0% | MLU: 10.46<br>TTR: .39<br>Abn: 0.0% |
| P4<br>(45)       | M4<br>(48)  | Coll<br>Cauc | 95.7<br>Min<br>Anom  | MLU: 4.12<br>TTR: .42<br>Abn: 5.8%  | MLU: 5.36<br>TTR: .43<br>Abn: 12.5% | MLU: 7.86<br>TTR: .36<br>Abn: 0.0%  | MLU: 7.08<br>TTR: .42<br>Abn: 0.0% | MLU: 5.83<br>TTR: .44<br>Abn: 13.8% | MLU: 6.50<br>TTR: .42<br>Abn: 3.1%  | MLU: 13.11<br>TTR: .49<br>Abn: 0.0% | MLU: 8.40<br>TTR: .50<br>Abn: 0.0%  |
| P5<br>(67)       | M5<br>(62)  | Gr<br>AA     | 66.4<br>Mod TCS      | MLU: 3.60<br>TTR: .26<br>Abn: 21.2% | MLU: 3.83<br>TTR: .22<br>Abn: 31.9% | MLU: 6.55<br>TTR: .40<br>Abn: 0.0%  | MLU: 7.93<br>TTR: .31<br>Abn: 0.0% | MLU: 3.98<br>TTR: .40<br>Abn: 3.8%  | MLU: 5.39<br>TTR: .40<br>Abn: 3.0%  | MLU: 9.49<br>TTR: .41<br>Abn: 0.0%  | MLU: 7.68<br>TTR: .36<br>Abn: 0.0%  |
| P6<br>(74)       | M6<br>(74)  | Coll<br>Cauc | 92.7<br>Mild<br>Anom | MLU: 5.47<br>TTR: .36<br>Abn: 5.5%  | MLU: 5.41<br>TTR: .39<br>Abn: 1.0%  | MLU: 8.32<br>TTR: .31<br>Abn: 2.2%  | MLU: 7.72<br>TTR: .33<br>Abn: 0.0% | MLU: 6.39<br>TTR: .36<br>Abn: 10.2% | MLU: 8.38<br>TTR: .32<br>Abn: 11.1% | MLU: 11.31<br>TTR: .37<br>Abn: 0.0% | MLU: 9.14<br>TTR: .39<br>Abn: 0.0%  |
| P7<br>(42)       | M7<br>(42)  | Coll<br>AA   | 89.2<br>Mild<br>Anom | MLU: 7.24<br>TTR: .24<br>Abn: 4.8%  | MLU: 5.76<br>TTR: .21<br>Abn: 1.9%  | MLU: 7.96<br>TTR: .30<br>Abn: 0.0%  | MLU: 8.14<br>TTR: .29<br>Abn: 0.0% | MLU: 8.23<br>TTR: .31<br>Abn: 2.3%  | MLU: 6.90<br>TTR: .33<br>Abn: 2.1%  | MLU: 10.44<br>TTR: .41<br>Abn: 2.1% | MLU: 8.06<br>TTR: .42<br>Abn: 0.0%  |
| P8<br>(67)       | M8<br>(62)  | Coll<br>Cauc | 68.0<br>Mod<br>TCM   | MLU: 2.96<br>TTR: .42<br>Abn: 25.7% | MLU: 3.42<br>TTR: .47<br>Abn: 19.7% | MLU: 7.99<br>TTR: .31<br>Abn: 0.0%  | MLU: 7.43<br>TTR: .31<br>Abn: 0.0% | MLU: 3.21<br>TTR: .41<br>Abn: 7.1%  | MLU: 3.71<br>TTR: .52<br>Abn: 5.6%  | MLU: 10.79<br>TTR: .38<br>Abn: 0.0% | MLU: 7.73<br>TTR: .46<br>Abn: 0.0%  |
| P9<br>(54)       | M9<br>(55)  | Coll<br>Cauc | 86.4<br>Mild<br>Anom | MLU: 6.85<br>TTR: .23<br>Abn: 3.8%  | MLU: 6.16<br>TTR: .38<br>Abn: 2.9%  | MLU: 7.42<br>TTR: .30<br>Abn: 0.0%  | MLU: 8.07<br>TTR: .28<br>Abn: 0.0% | MLU: 8.73<br>TTR: .28<br>Abn: 7.1%  | MLU: 10.64<br>TTR: .33<br>Abn: 0.0% | MLU: 9.66<br>TTR: .41<br>Abn: 0.0%  | MLU: 9.46<br>TTR: .40<br>Abn: 0.0%  |
| P10<br>(38)      | M10<br>(37) | Gr<br>Cauc   | 96.3<br>Min<br>Anom  | MLU: 7.36<br>TTR: .30<br>Abn: 1.0%  | MLU: 8.24<br>TTR: .32<br>Abn: 1.0%  | MLU: 8.70<br>TTR: .36<br>Abn: 0.0%  | MLU: 7.08<br>TTR: .31<br>Abn: 0.0% | MLU: 8.12<br>TTR: .33<br>Abn: 0.0%  | MLU: 8.24<br>TTR: .33<br>Abn: 0.0%  | MLU: 8.75<br>TTR: .41<br>Abn: 0.0%  | MLU: 8.62<br>TTR: .38<br>Abn: 0.0%  |

|                    |                    |              |                      |                                     |                                     |                                    |                                     |                                     |                                     |                                     |                                     |
|--------------------|--------------------|--------------|----------------------|-------------------------------------|-------------------------------------|------------------------------------|-------------------------------------|-------------------------------------|-------------------------------------|-------------------------------------|-------------------------------------|
| P11<br>(76)        | M11<br>(78)        | Coll<br>Cauc | 85.1<br>Mild<br>Cond | MLU: 7.12<br>TTR: .35<br>Abn: 1.0%  | MLU: 6.11<br>TTR: .36<br>Abn: 1.0%  | MLU: 8.18<br>TTR: .34<br>Abn: 0.0% | MLU: 8.75<br>TTR: .32<br>Abn: 0.0%  | MLU: 7.85<br>TTR: .38<br>Abn: 1.7%  | MLU: 8.06<br>TTR: .41<br>Abn: 4.1%  | MLU: 10.20<br>TTR: .37<br>Abn: 0.0% | MLU: 7.58<br>TTR: .42<br>Abn: 2.3%  |
| P12~<br>(47)       | M12<br>(45)        | Gr<br>Asian  | 61.0<br>Mod<br>Cond  | MLU: 5.28<br>TTR: .27<br>Abn: 2.3%  | MLU: 4.63<br>TTR: .30<br>Abn: 6.2%  | MLU: 9.02<br>TTR: .24<br>Abn: 0.0% | MLU: 8.71<br>TTR: .32<br>Abn: 0.0%  | MLU: 6.68<br>TTR: .27<br>Abn: 1.1%  | MLU: 5.08<br>TTR: .25<br>Abn: 7.6%  | MLU: 9.39<br>TTR: .43<br>Abn: 0.0%  | MLU: 11.28<br>TTR: .35<br>Abn: 0.0% |
| P13<br>(74)        | M13<br>(73)        | HS<br>Cauc   | 88.5<br>Mild<br>Anom | MLU: 6.87<br>TTR: .28<br>Abn: 1.8%  | MLU: 6.87<br>TTR: .31<br>Abn: 1.1%  | MLU: 9.53<br>TTR: .33<br>Abn: 0.0% | MLU: 11.09<br>TTR: .31<br>Abn: 0.0% | MLU: 6.60<br>TTR: .25<br>Abn: 7.1%  | MLU: 6.55<br>TTR: .32<br>Abn: 2.5%  | MLU: 8.90<br>TTR: .39<br>Abn: 0.0%  | MLU: 11.55<br>TTR: .41<br>Abn: 0.0% |
| P14<br>(57)        | M14<br>(56)        | Coll<br>Cauc | 91.2<br>Mild<br>Anom | MLU: 9.75<br>TTR: .23<br>Abn: 3.1%  | MLU: 4.63<br>TTR: .24<br>Abn: 2.8%  | MLU: 6.99<br>TTR: .32<br>Abn: 0.0% | MLU: 6.12<br>TTR: .31<br>Abn: 0.0%  | MLU: 10.48<br>TTR: .35<br>Abn: 2.2% | MLU: 12.46<br>TTR: .26<br>Abn: 0.0% | MLU: 13.04<br>TTR: .38<br>Abn: 0.0% | MLU: 11.92<br>TTR: .34<br>Abn: 0.0% |
| <b>P15</b><br>(77) | <b>M15</b><br>(77) | Gr<br>Cauc   | 97.2<br>Min<br>Anom  | MLU: 6.23<br>TTR: .32<br>Abn: 7.4%  | MLU: 6.87<br>TTR: .37<br>Abn: 1.2%  | MLU: 6.60<br>TTR: .35<br>Abn: 0.0% | MLU: 7.00<br>TTR: .31<br>Abn: 0.0%  | MLU: 7.97<br>TTR: .25<br>Abn: 7.6%  | MLU: 7.86<br>TTR: .28<br>Abn: 9.5%  | MLU: 8.11<br>TTR: .34<br>Abn: 0.0%  | MLU: 9.13<br>TTR: .31<br>Abn: 0.0%  |
| <b>P16</b><br>(65) | <b>M16</b><br>(64) | HS<br>Cauc   | 94.7<br>Min<br>Anom  | MLU: 7.21<br>TTR: .37<br>Abn: 3.7%  | MLU: 8.89<br>TTR: .33<br>Abn: 4.4%  | MLU: 6.89<br>TTR: .35<br>Abn: 0.0% | MLU: 6.36<br>TTR: .35<br>Abn: 0.0%  | MLU: 6.90<br>TTR: .38<br>Abn: 0.0%  | MLU: 7.59<br>TTR: .46<br>Abn: 0.0%  | MLU: 8.41<br>TTR: .46<br>Abn: 0.0%  | MLU: 8.96<br>TTR: .44<br>Abn: 0.0%  |
| P17<br>(41)        | M17<br>(40)        | Coll<br>Cauc | 65.8<br>Mod<br>Wern  | MLU: 4.27<br>TTR: .29<br>Abn: 14.9% | MLU: 4.72<br>TTR: .32<br>Abn: 18.9% | MLU: 8.05<br>TTR: .28<br>Abn: 0.0% | MLU: 9.10<br>TTR: .29<br>Abn: 0.0%  | MLU: 4.85<br>TTR: .28<br>Abn: 5.3%  | MLU: 4.53<br>TTR: .37<br>Abn: 9.4%  | MLU: 11.06<br>TTR: .37<br>Abn: 0.0% | MLU: 9.98<br>TTR: .42<br>Abn: 0.0%  |
| P18<br>(62)        | M18<br>(63)        | Gr<br>Cauc   | 52.2<br>Mod<br>Cond  | MLU: 4.94<br>TTR: .16<br>Abn: 2.9%  | MLU: 7.30<br>TTR: .15<br>Abn: 3.2%  | MLU: 8.81<br>TTR: .31<br>Abn: 0.0% | MLU: 8.09<br>TTR: .36<br>Abn: 0.0%  | MLU: 4.16<br>TTR: .34<br>Abn: 8.0%  | MLU: 4.48<br>TTR: .30<br>Abn: 1.8%  | MLU: 12.16<br>TTR: .38<br>Abn: 0.0% | MLU: 9.04<br>TTR: .39<br>Abn: 0.0%  |
| P19<br>(64)        | M19<br>(62)        | HS<br>Cauc   | 58.8<br>Mod<br>Broca | MLU: 2.68<br>TTR: .40<br>Abn: 0.0%  | MLU: 3.94<br>TTR: .37<br>Abn: 2.1%  | MLU: 8.06<br>TTR: .30<br>Abn: 0.0% | MLU: 7.51<br>TTR: .32<br>Abn: 0.0%  | MLU: 2.96<br>TTR: .42<br>Abn: 0.0%  | MLU: 2.09<br>TTR: .42<br>Abn: 0.0%  | MLU: 6.65<br>TTR: .45<br>Abn: 0.0%  | MLU: 5.94<br>TTR: .49<br>Abn: 0.0%  |
| P20<br>(65)        | M20<br>(67)        | Coll<br>Cauc | 90.4<br>Mild<br>Anom | MLU: 7.88<br>TTR: .34<br>Abn: 15.9% | MLU: 3.95<br>TTR: .31<br>Abn: 21.9% | MLU: 9.01<br>TTR: .37<br>Abn: 0.0% | MLU: 8.76<br>TTR: .35<br>Abn: 0.0%  | MLU: 7.52<br>TTR: .29<br>Abn: 1.1%  | MLU: 7.98<br>TTR: .35<br>Abn: 1.5%  | MLU: 13.34<br>TTR: .36<br>Abn: 0.0% | MLU: 11.39<br>TTR: .38<br>Abn: 0.0% |

Note. ID = participant identifier, ED/R = education/race & ethnicity; PWA = person with aphasia; M-PWoA = matched participant without aphasia; WAB-AQ = Western Aphasia Battery –Revised, Aphasia Quotient; Coll = college; MLU = mean length of utterance; TTR = type token ratio; Abn = % abandoned utterances due to lexical retrieval difficulty, identified by behaviors, e.g., comments, frustration, request for assistance, etc.; **bold = female**; CauC = Caucasian, non-Latino; Anom = anomia; HS = high school; † = 5 left hemisphere strokes; CauL = Caucasian, Latino; Cond = conduction aphasia; *italics* = extended transcription, for P3, because partner told a story for 2'53"; for P8 and P19, to obtain > 300 words; for P18, to allow participant to complete topic; Min = minimal aphasia, WAB score > 93.8; Gr = graduate degree; AA = African American, non-Latino; Mod = moderate; TCS = transcortical sensory aphasia; TCM = transcortical motor aphasia; # = visit 2 conversation had fewer than 300 words, so sample 1 was truncated; ~ = First language Korean until age 6, then immersed in American school; † = 2 left hemisphere strokes; ^ = reliability conducted on 28% of sample; Wern = Wernicke's aphasia.
